# Supplementary material for: Cysteine residue-bridged dinuclear Ni–Fe complexes related to [NiFe]-H2ases
Source: Royal Society of Chemistry journal article supplement (doi:10.1039/d1nj03872a), 2021-01-01
Supplement: d1nj03872a1.pdf [file d1nj03872a1.pdf]

## Supporting Information

### The cysteine residue-bridged dinuclear Ni-Fe complexes related to [NiFe]-H<sub>2</sub>ases

Li-Cheng Song,\* Zhen-Qing Zhang, Zhen-Chao Gu, and Kai-Yu Jiang

Department of Chemistry, State Key Laboratory of Elemento-Organic Chemistry, College of Chemistry, Nankai University, Tianjin 300071, China

### Contents:

1. IR and <sup>1</sup>H (<sup>13</sup>C, <sup>31</sup>P) NMR spectra of 1 (Fig. S1–S4)
2. IR and <sup>1</sup>H (<sup>13</sup>C, <sup>31</sup>P) NMR spectra of 2 (Fig. S5–S8)
3. IR and <sup>1</sup>H (<sup>13</sup>C, <sup>31</sup>P) NMR spectra of 3 (Fig. S9–S12)
4. IR and <sup>1</sup>H (<sup>13</sup>C, <sup>31</sup>P) NMR spectra of 4 (Fig. S13–S16)
5. IR and <sup>1</sup>H (<sup>13</sup>C, <sup>31</sup>P) NMR spectra of 5 (Fig. S17–S20)
6. IR and <sup>1</sup>H (<sup>13</sup>C, <sup>31</sup>P) NMR spectra of 6 (Fig. S21–S24)
7. Controlled-potential electrolysis (CPE) for the two-electron reduction of [CpFe(CO)<sub>2</sub>]<sub>2</sub> and the one-electron reductions for the first reduction events of 1 and 4 (Fig. S25)
8. Controlled-potential electrolysis (CPE) for the two-electron reduction of [CpFe(CO)<sub>2</sub>]<sub>2</sub> and the one-electron oxidations for the first oxidation events of 1 and 4 (Fig. S26).
9. Cyclic voltammogram of bis(1,1'-ketocysteine)ferrocene Fe[η<sup>5</sup>-C<sub>5</sub>H<sub>4</sub>CONHCH(CO<sub>2</sub>Me)CH<sub>2</sub>SH]<sub>2</sub> (A) (Fig. S27)
10. Cyclic voltammograms in HOAc in the presence of catalyst 1 or 4 and without 1 or 4 in MeCN (Fig. S28 and S29)
11. Dependence of *i*<sub>cat</sub>/*i*<sub>p</sub> for 1 and 4 upon HOAc concentration in MeCN (Fig. S30)
12. Overpotential determinations for 1 and 4 with HOAc in MeCN (Fig. S31 and S32)
13. CPE experiments with 50 mM HOAc in MeCN for hydrogen evolution reaction (HER) catalyzed by 1 and 4 (Fig. S33 and S34)

## 1. IR and $^1\text{H}$ ( $^{13}\text{C}$ , $^{31}\text{P}$ ) NMR spectra of **1**

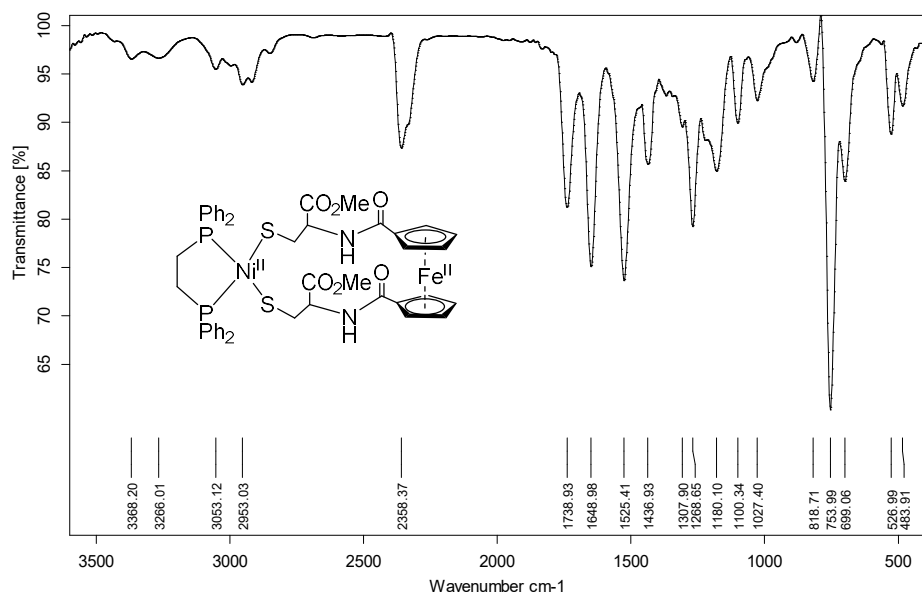

Fig. S1 IR spectrum of **1**

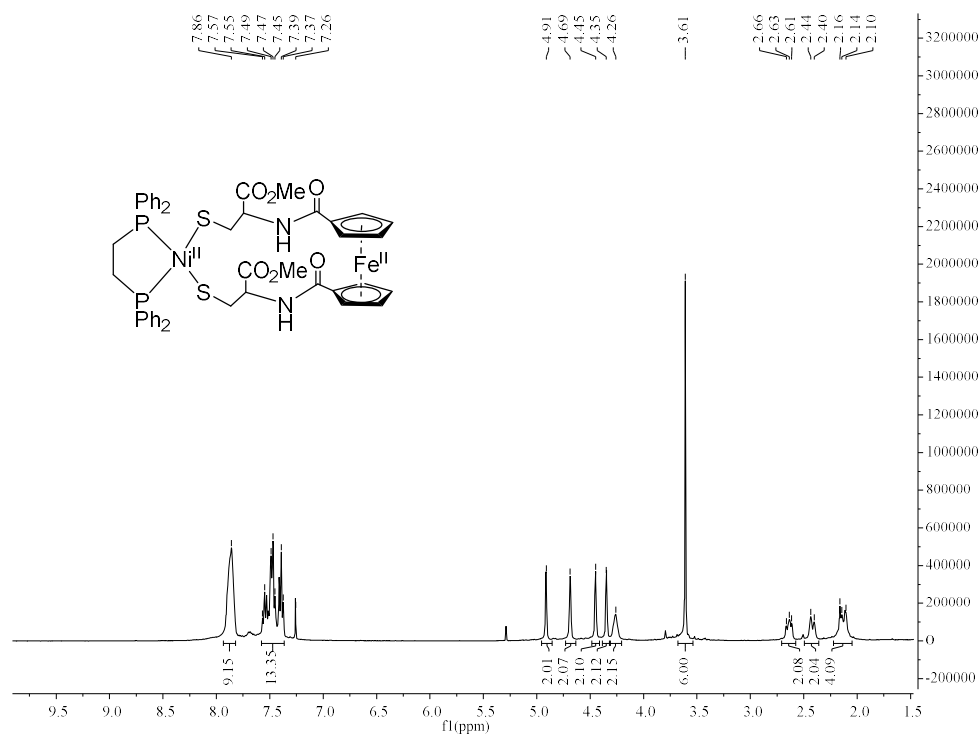

Fig. S2  $^1\text{H}$  NMR spectrum of **1**

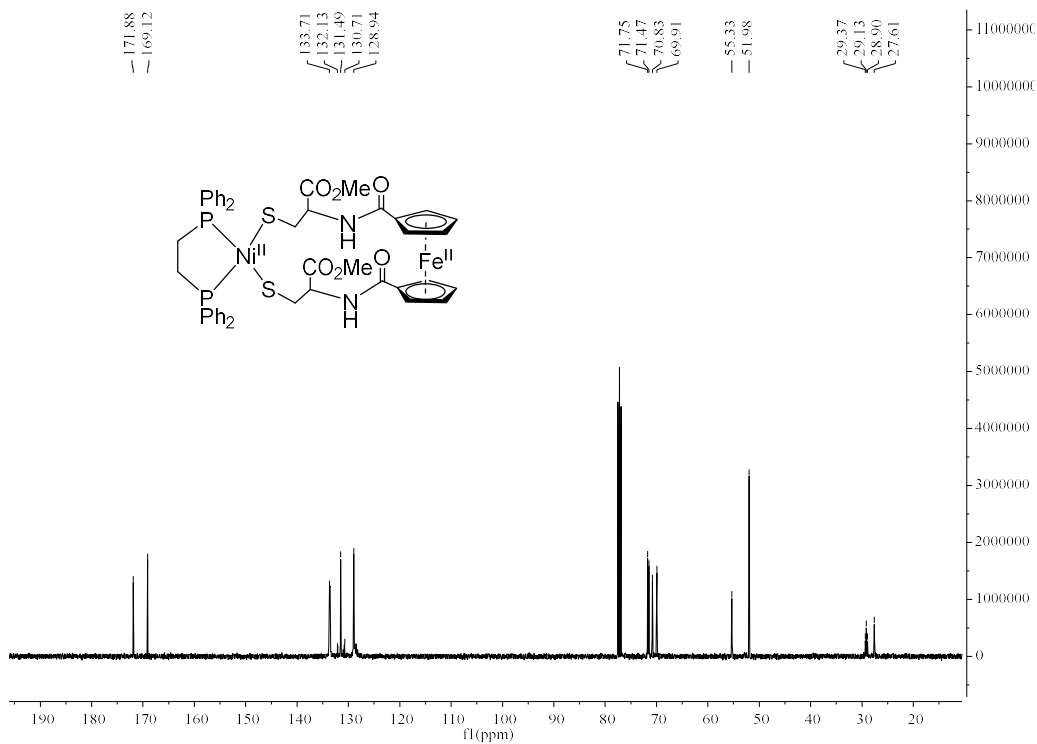

**Fig. S3**  $^{13}\text{C}$  NMR spectrum of **1**

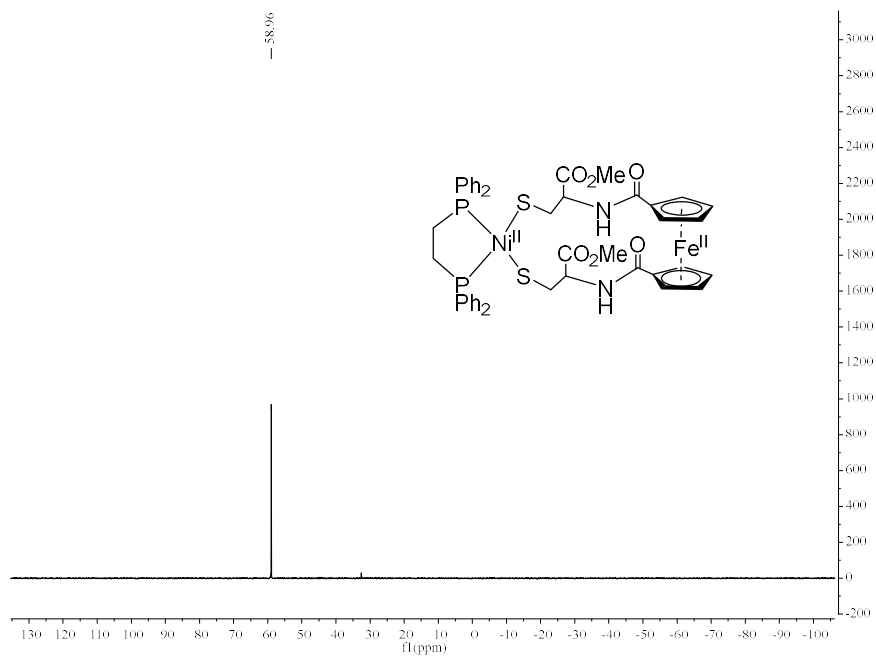

**Fig. S4**  $^{31}\text{P}$  NMR spectrum of **1**

## 2. IR and $^1\text{H}$ ( $^{13}\text{C}$ , $^{31}\text{P}$ ) NMR spectra of 2

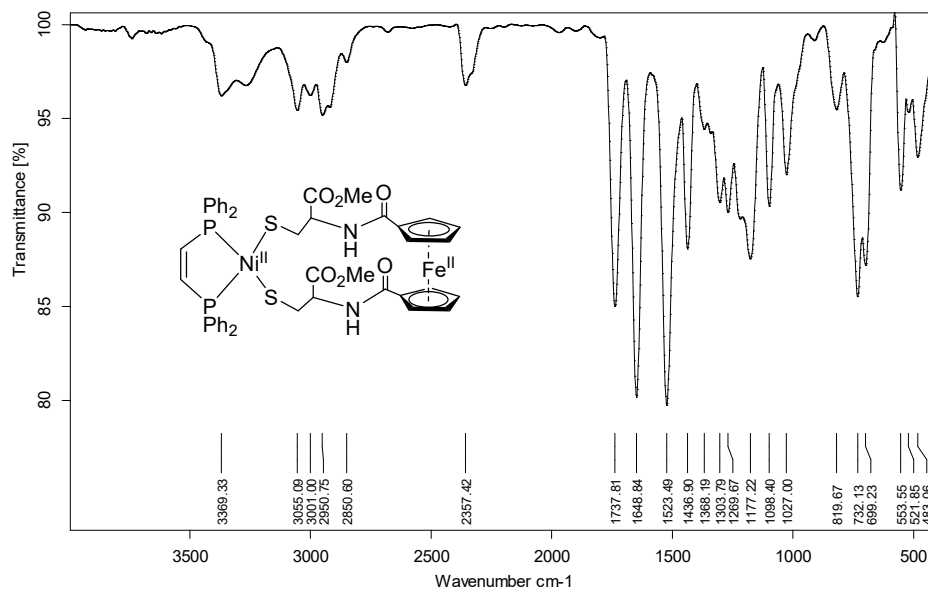

Fig. S5 IR spectrum of 2

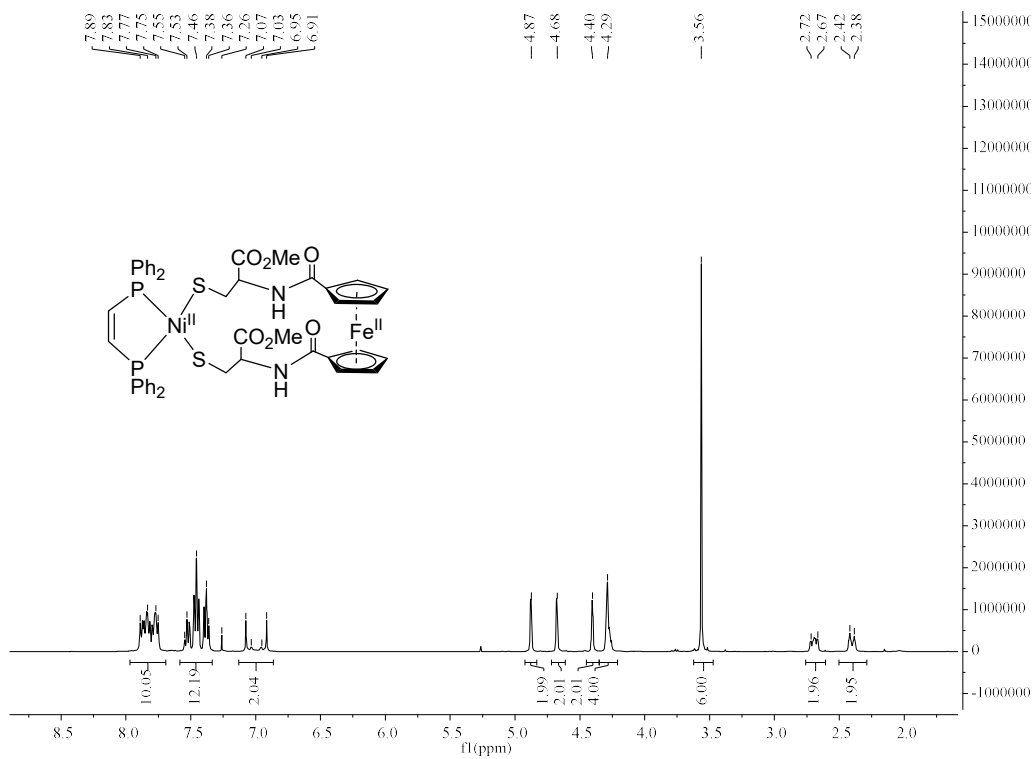

Fig. S6  $^1\text{H}$  NMR spectrum of 2

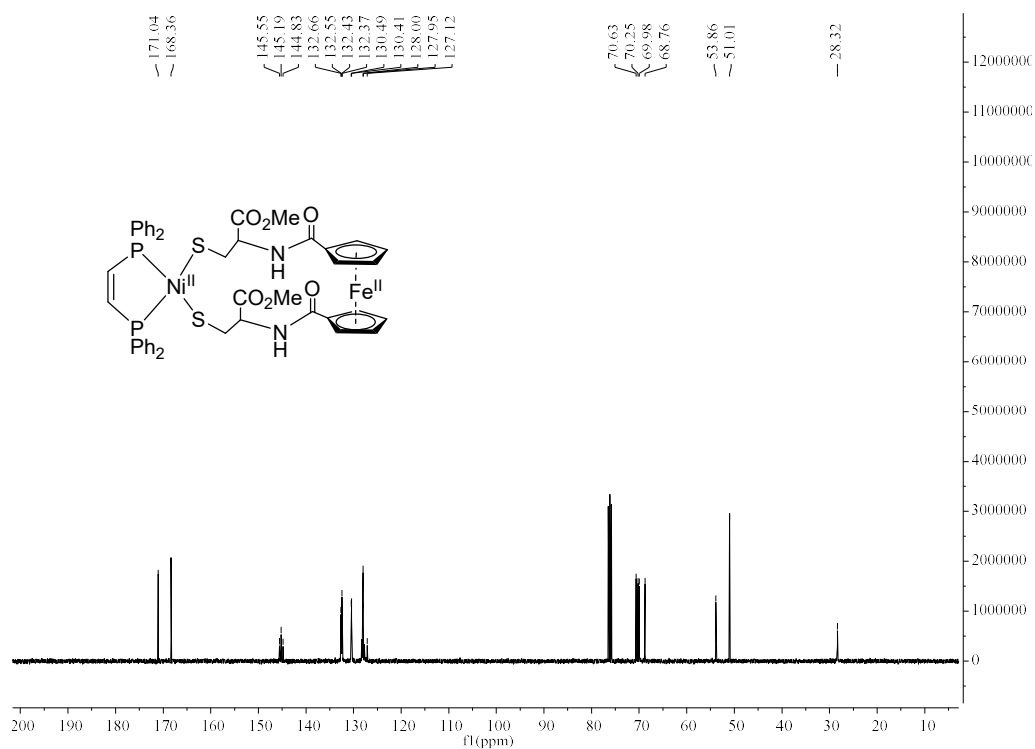

**Fig. S7** <sup>13</sup>C NMR spectrum of **2**

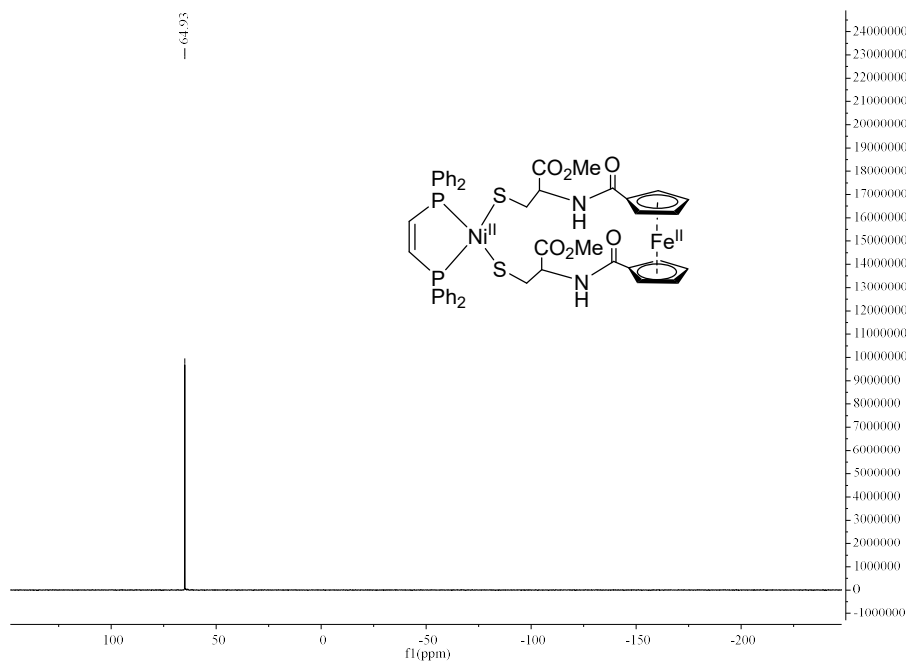

**Fig. S8** <sup>31</sup>P NMR spectrum of **2**

### 3. IR and $^1\text{H}$ ( $^{13}\text{C}$ , $^{31}\text{P}$ ) NMR spectra of **3**

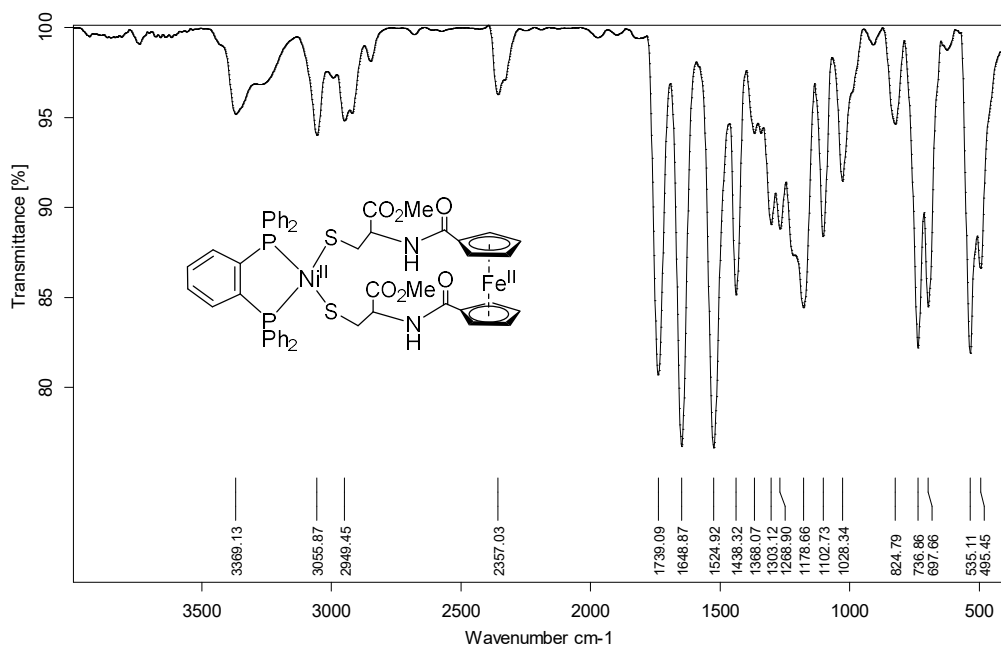

Fig. S9 IR spectrum of **3**

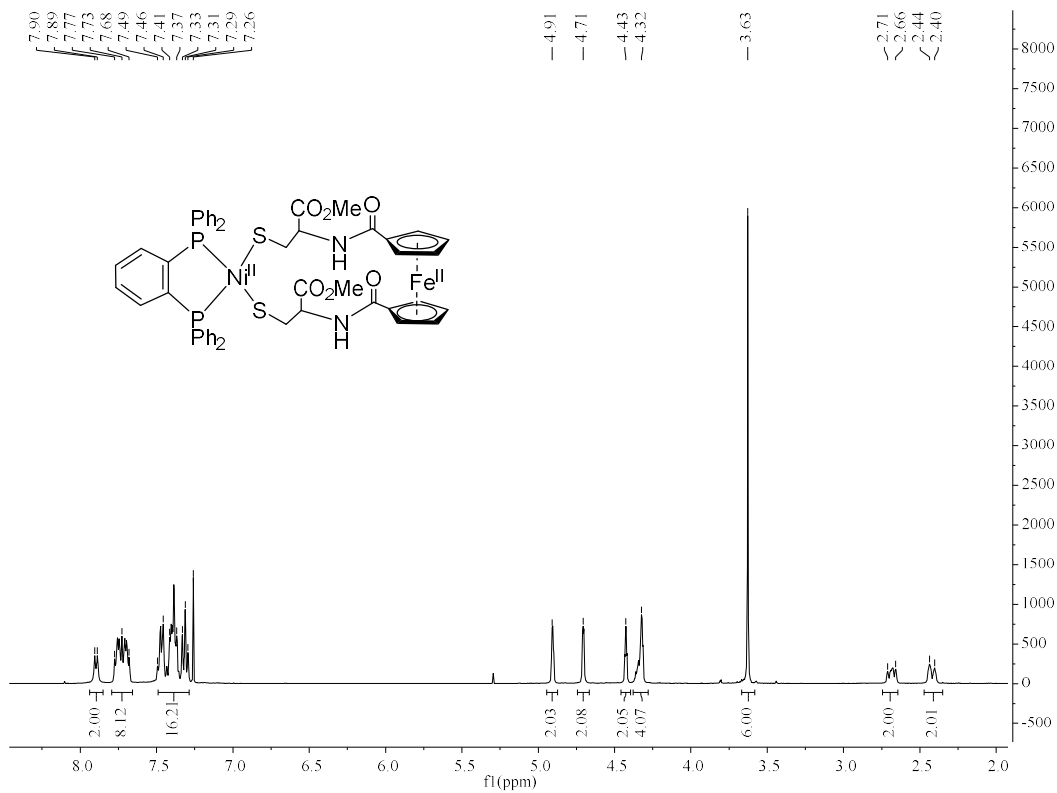

Fig. S10  $^1\text{H}$  NMR spectrum of **3**

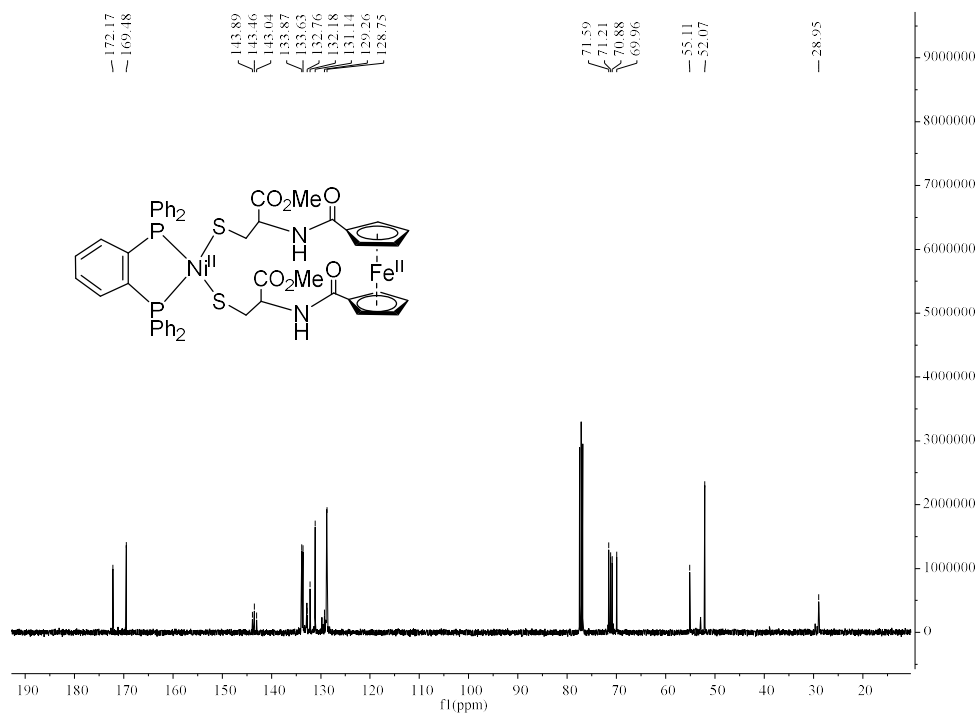

**Fig. S11**  $^{13}\text{C}$  NMR spectrum of **3**

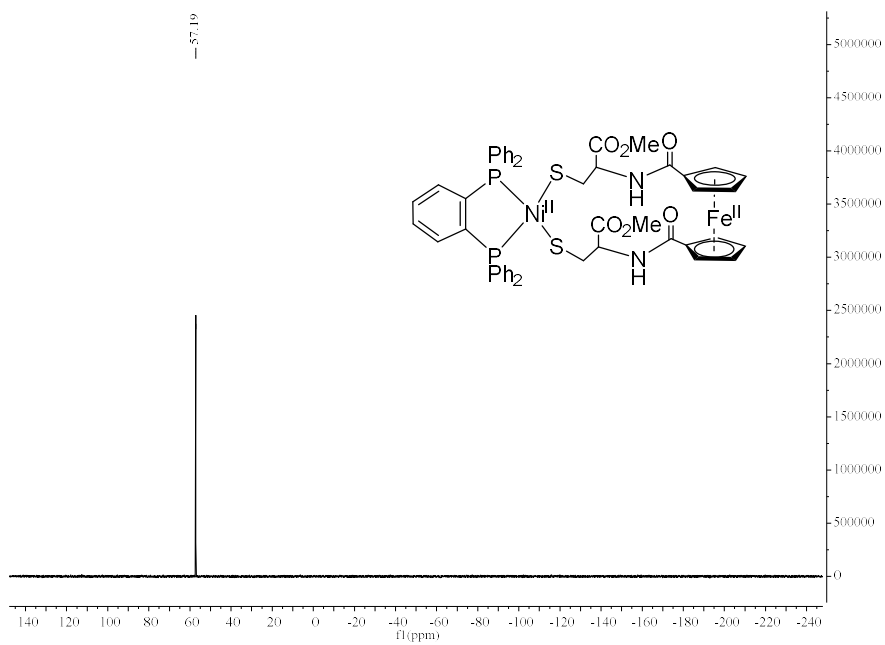

**Fig. S12**  $^{31}\text{P}$  NMR spectrum of **3**

#### 4. IR and $^1\text{H}$ ( $^{13}\text{C}$ , $^{31}\text{P}$ ) NMR spectra of 4

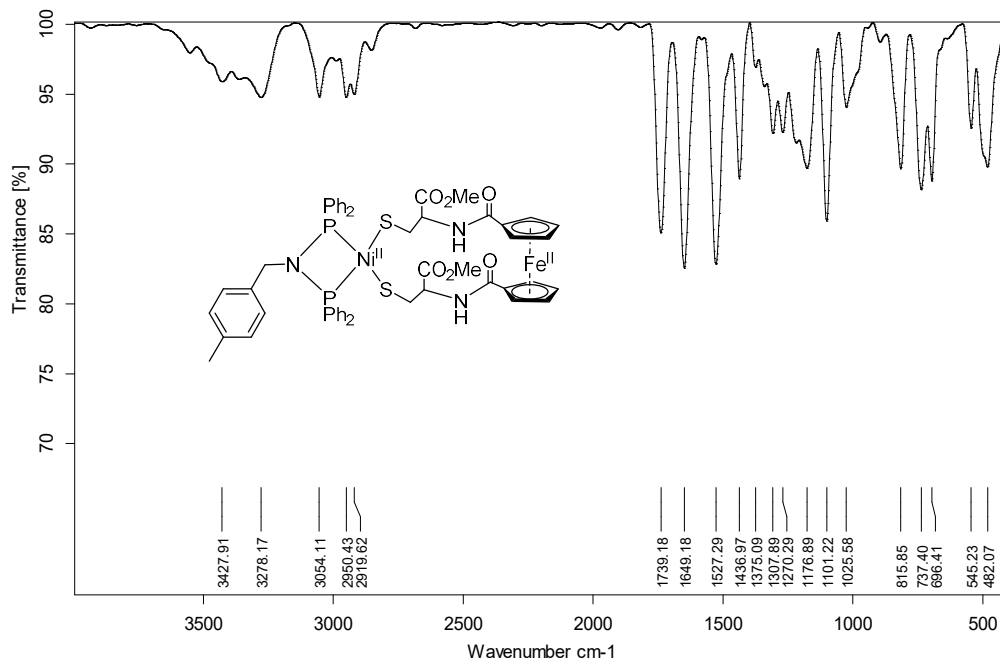

Fig. S13 IR spectrum of 4

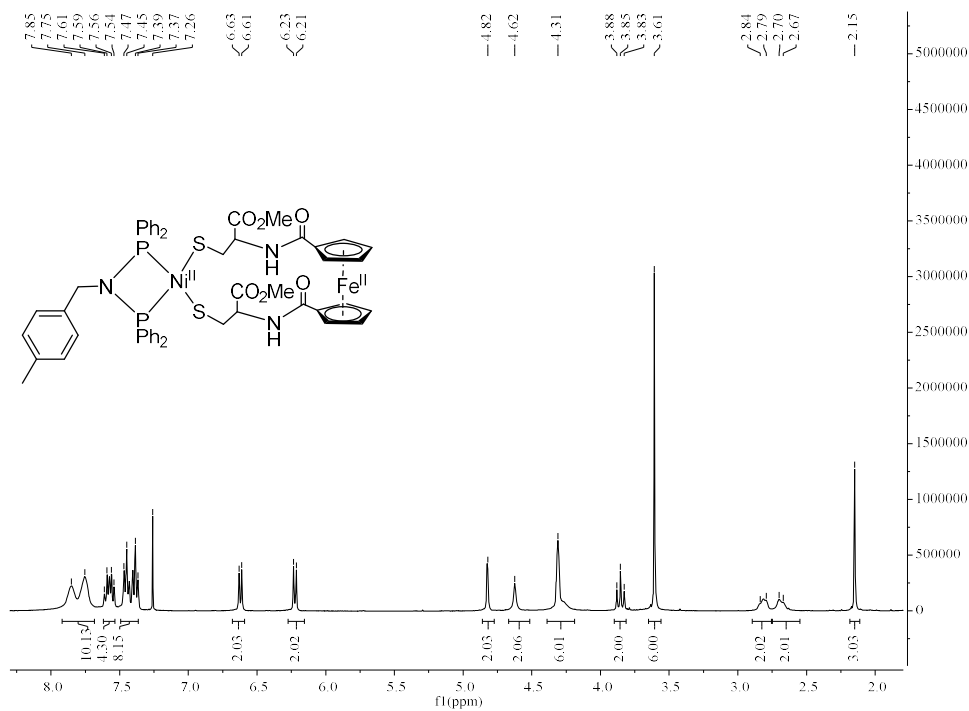

Fig. S14  $^1\text{H}$  NMR spectrum of 4



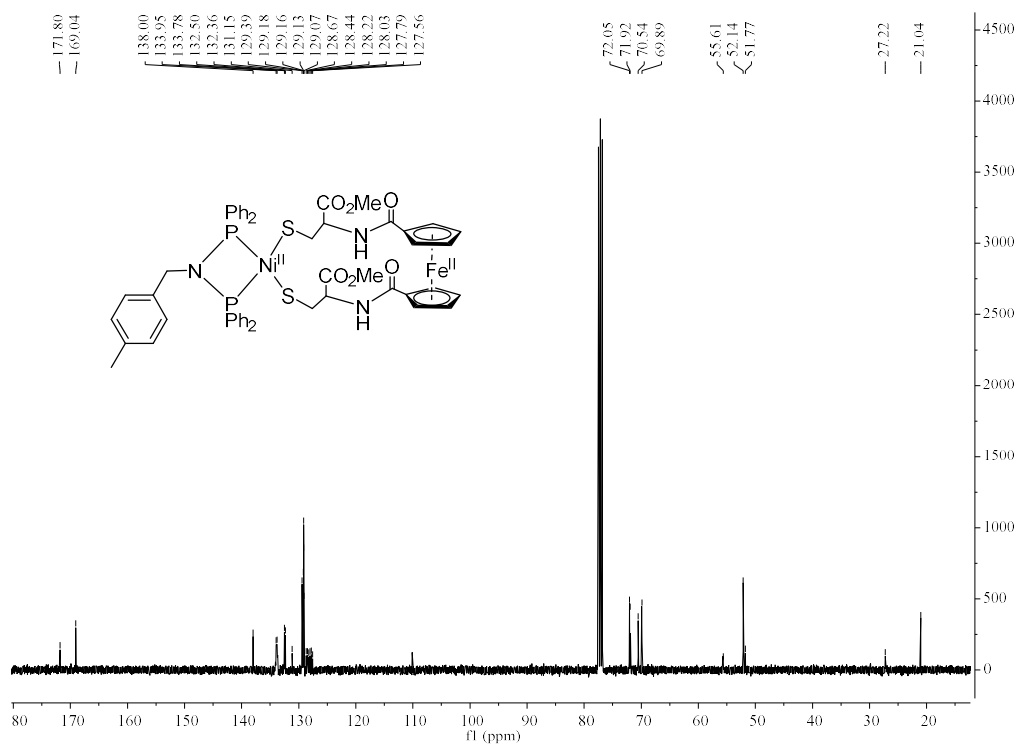

Fig. S15 <sup>13</sup>C NMR spectrum of 4

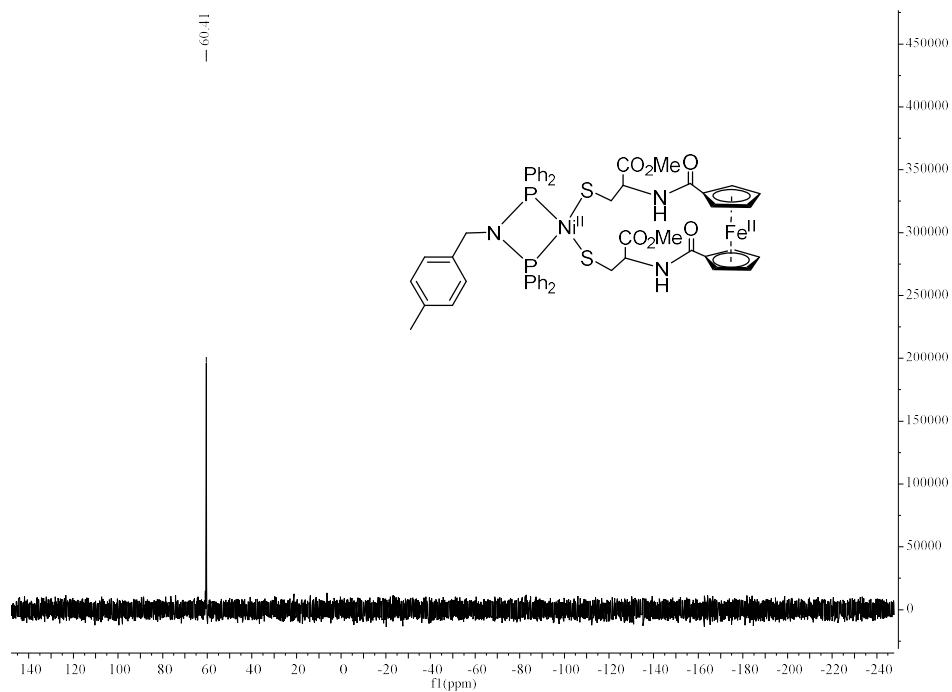

Fig. S16 <sup>31</sup>P NMR spectrum of 4

## 5. IR and $^1\text{H}$ ( $^{13}\text{C}$ , $^{31}\text{P}$ ) NMR spectra of 5

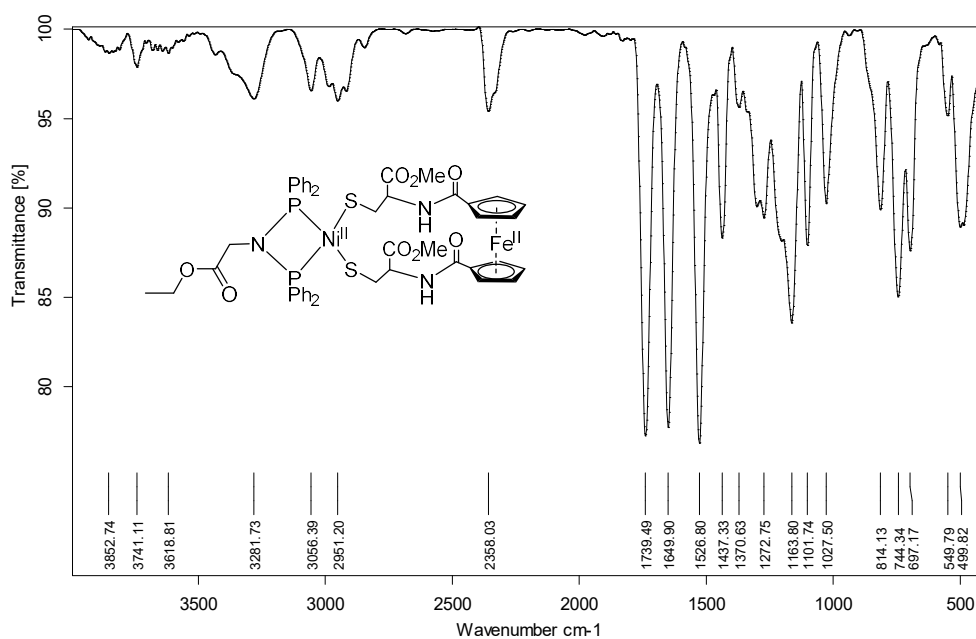

Fig. S17 IR spectrum of 5

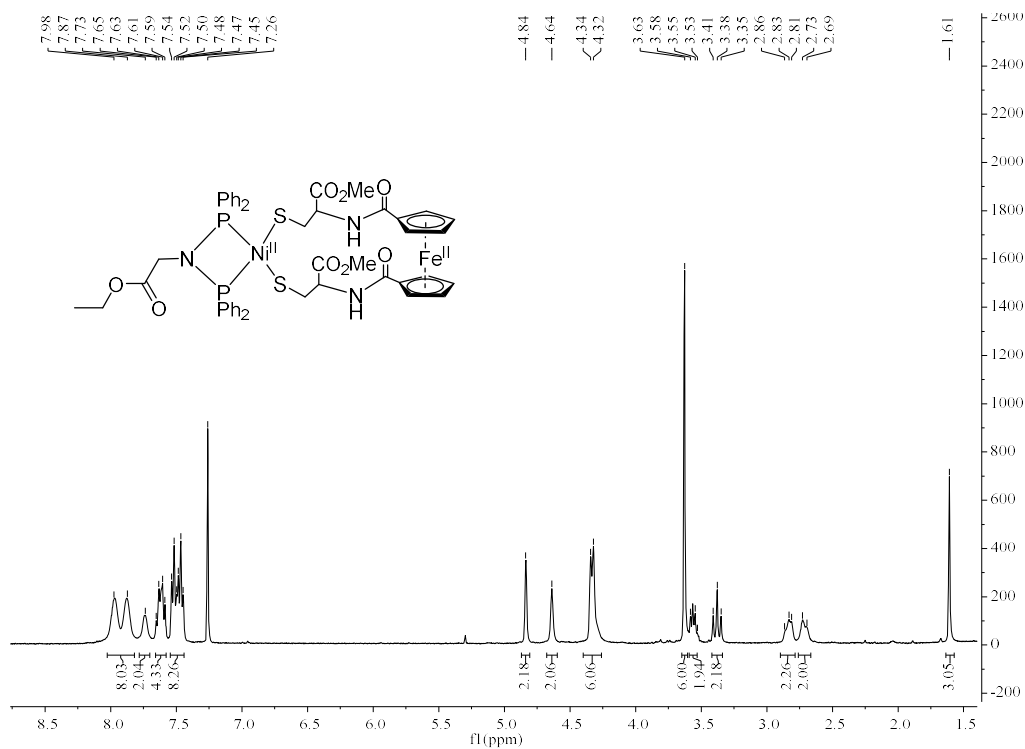

Fig. S18  $^1\text{H}$  NMR spectrum of 5

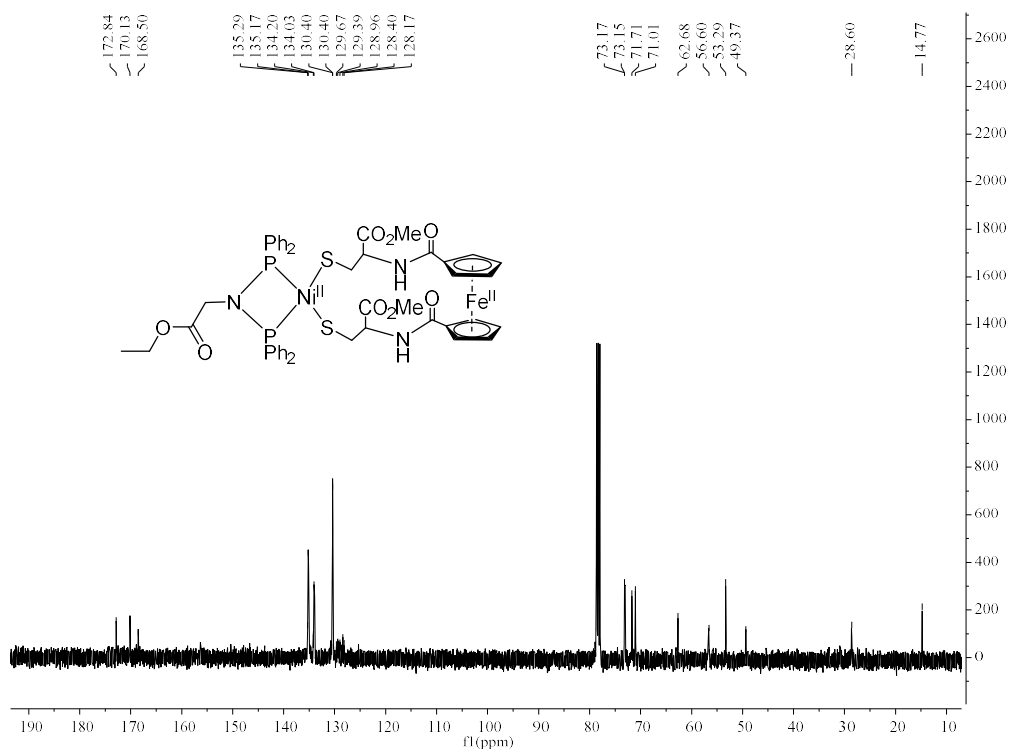

Fig. S19  $^{13}\text{C}$  NMR spectrum of 5

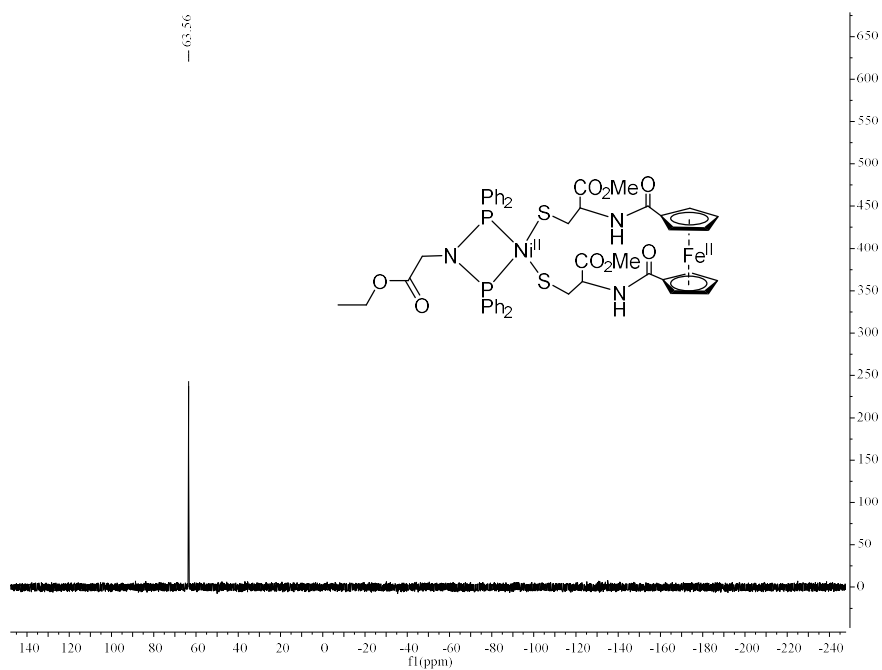

Fig. S20  $^{31}\text{P}$  NMR spectrum of 5

## 6. IR and $^1\text{H}$ ( $^{13}\text{C}$ , $^{31}\text{P}$ ) NMR spectra of 6

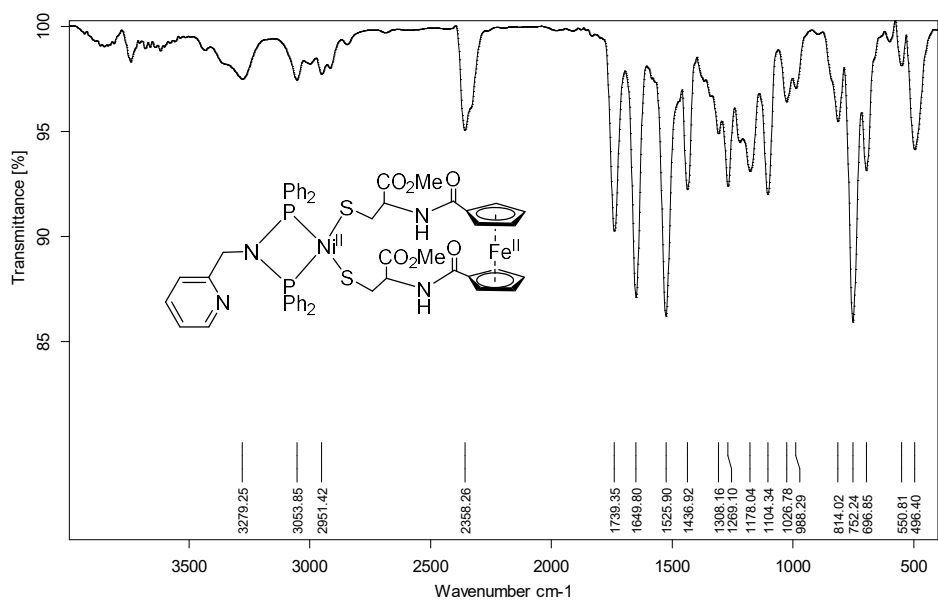

Fig. S21 IR spectrum of 6

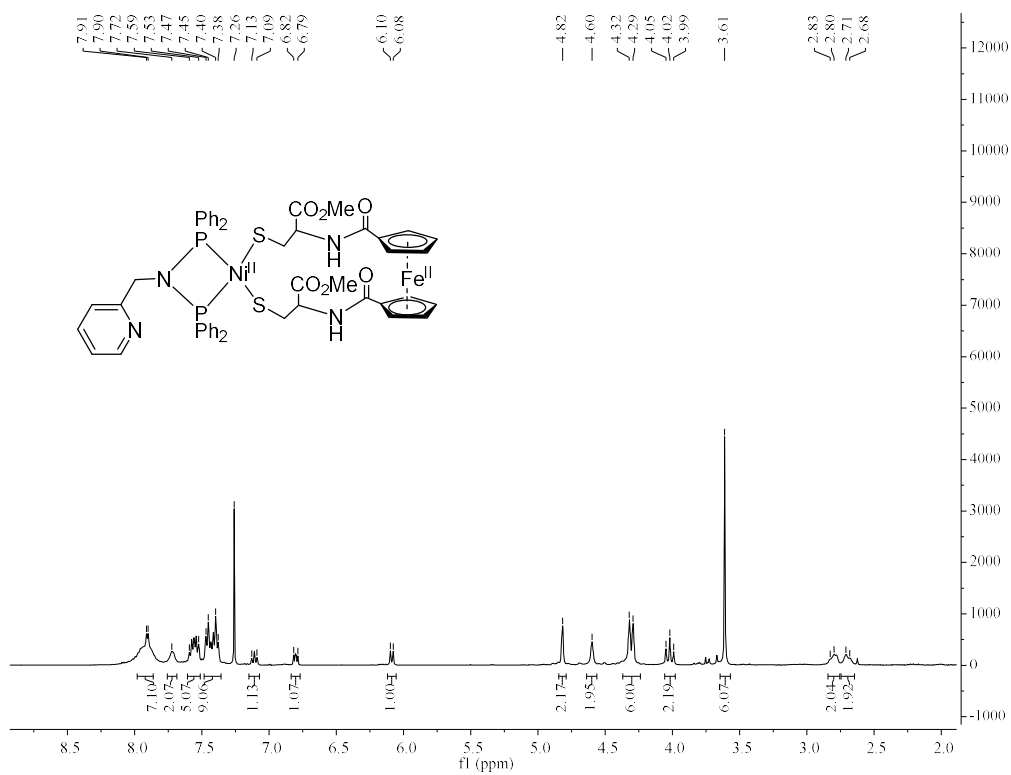

Fig. S22  $^1\text{H}$  NMR spectrum of 6

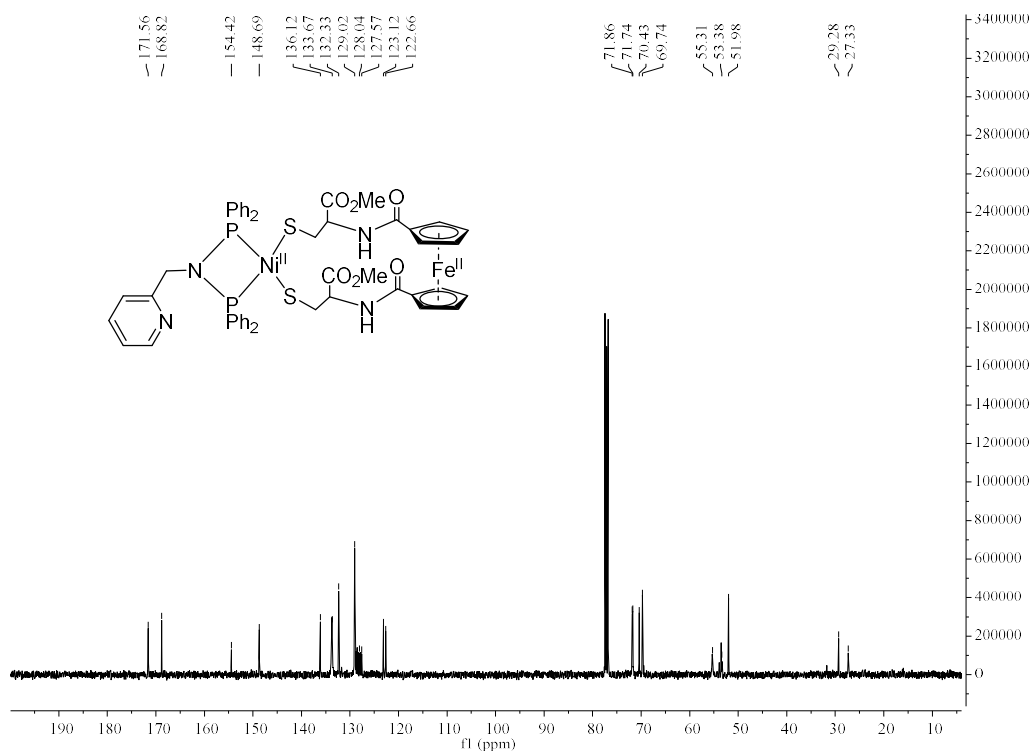

Fig. S23 <sup>13</sup>C NMR spectrum of 6

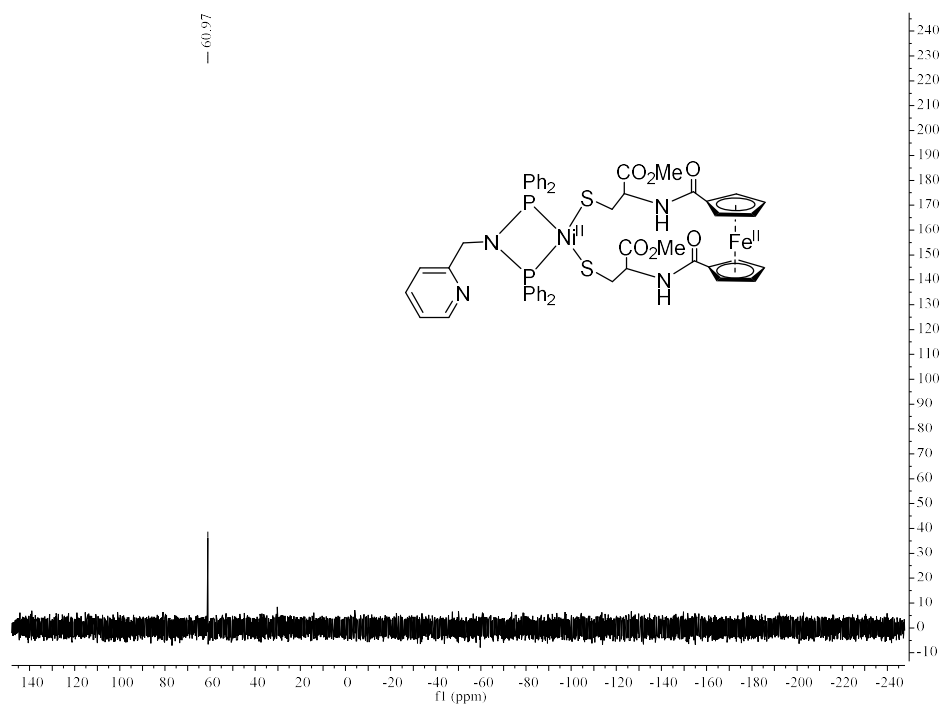

Fig. S24 <sup>31</sup>P NMR spectrum of 6

## 7. Controlled-potential electrolysis (CPE) for the two-electron reduction of $[\text{CpFe}(\text{CO})_2]_2$ and the one-electron reductions for the first reduction events of **1** and **4**

The first reduction events for **1** and **4** are one-electron processes since their final  $Q$  values determined by CPE are almost close to half that of the known two-electron reduction process of dimer  $[\text{CpFe}(\text{CO})_2]_2$ .<sup>1,2</sup>

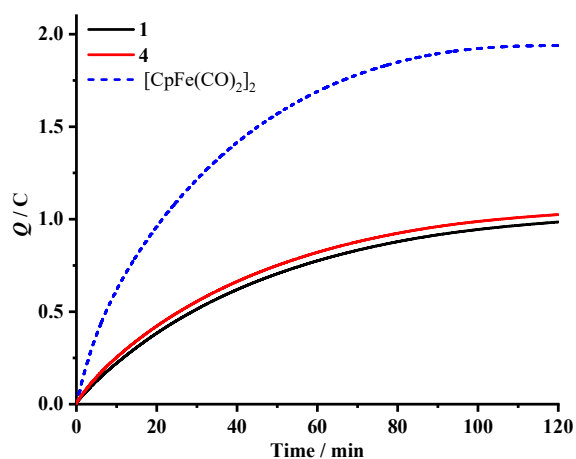

**Fig. S25** CPE for the two-electron reduction of  $[\text{CpFe}(\text{CO})_2]_2$  and the one-electron reductions for the first reduction events of **1** and **4**.

## 8. Controlled-potential electrolysis (CPE) for the two-electron reduction of $[\text{CpFe}(\text{CO})_2]_2$ and the one-electron oxidations for the first oxidation events of **1** and **4**

The first oxidation events for **1** and **4** are one-electron processes since their final Q values determined by CPE are almost close to half that of the known two-electron reduction process of dimer  $[\text{CpFe}(\text{CO})_2]_2$ .<sup>1,2</sup>

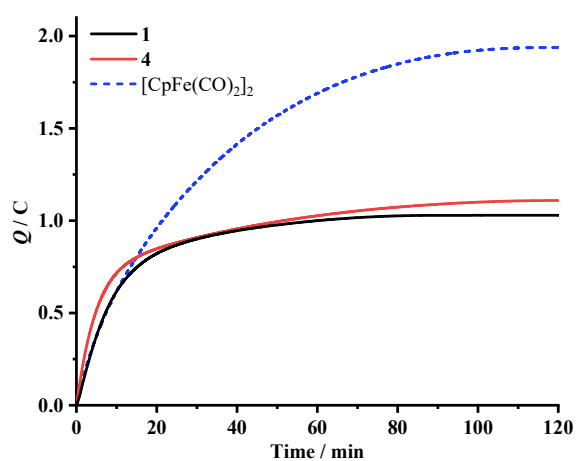

**Fig. S26** CPE for the two-electron reduction of  $[\text{CpFe}(\text{CO})_2]_2$  and the one-electron oxidations for the first oxidation events of **1** and **4**.

9. Cyclic voltammogram of bis(1,1'-ketocysteine)ferrocene

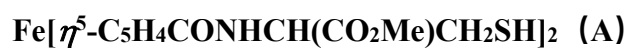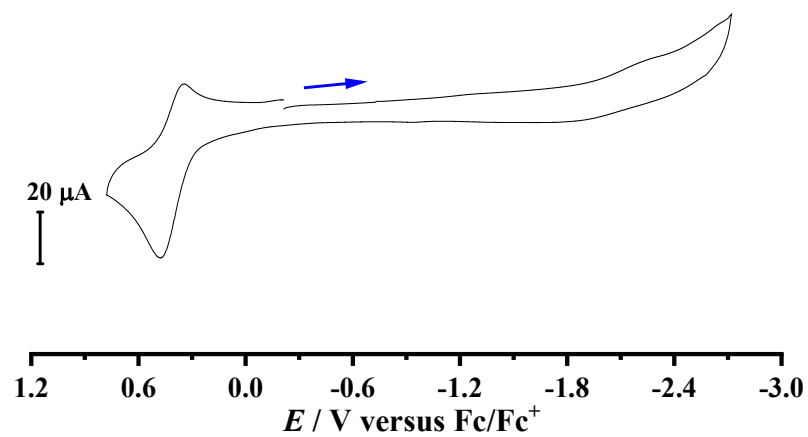

**Fig. S27** Cyclic voltammogram of complex A (1.0 mM) in 0.1 M  $n\text{-Bu}_4\text{PF}_6/\text{MeCN}$  at a scan rate of  $0.1 \text{ V s}^{-1}$ . Arrow indicates the starting potential and scan direction.



**10. Cyclic voltammograms in HOAc in the presence of catalyst 1 or 4 and without 1 or 4 in MeCN**

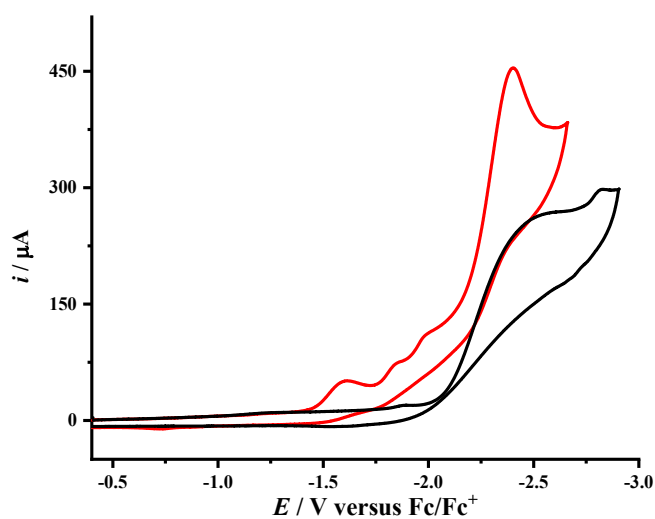

**Fig. S28** Cyclic voltammograms in 40 mM HOAc in the presence of 1.0 mM catalyst **1** (red line) and without **1** (black line) in 0.1 M  $n\text{-Bu}_4\text{NPF}_6$  at a scan rate of  $0.1 \text{ V s}^{-1}$ .

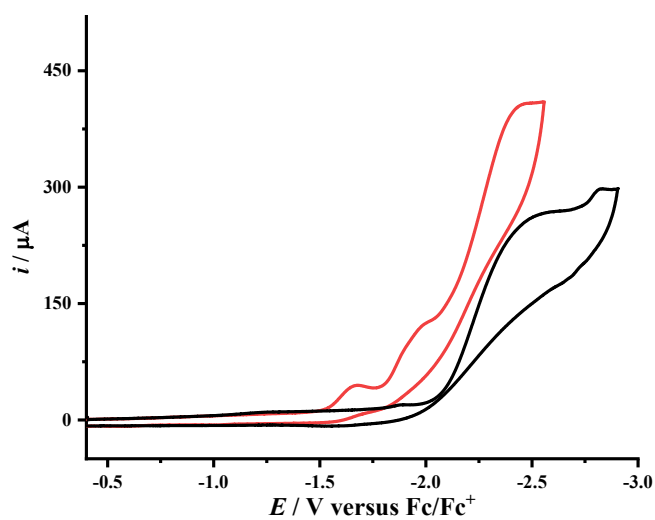

**Fig. S29** Cyclic voltammograms in 40 mM HOAc in the presence of 1.0 mM catalyst **4** (red line) and without **4** (black line) in 0.1 M  $n\text{-Bu}_4\text{NPF}_6$  at a scan rate of  $0.1 \text{ V s}^{-1}$ .

### 11. Dependence of $i_{cat}/i_p$ for 1 and 4 upon HOAc concentration in MeCN

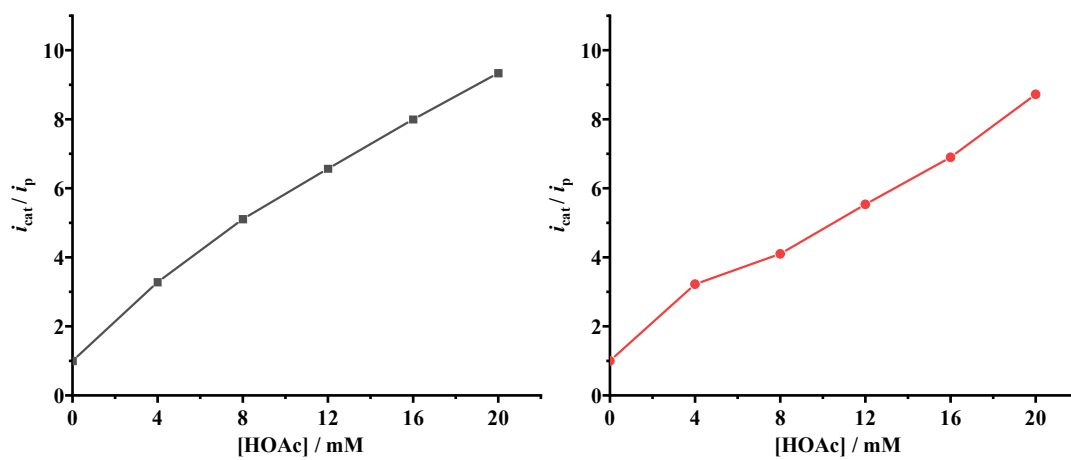

**Fig. S30** Dependence of  $i_{cat}/i_p$  for complexes **1** (■) and **4** (●) (1.0 mM) upon HOAc concentration (0, 4, 8, 12, 16, 20 mM) in MeCN.

## 12. Overpotential determinations for 1 and 4 with HOAc in MeCN

Since the  $pK_a$  and the standard redox potential of HOAc in MeCN ( $pK_a^{\text{MeCN}} = 22.3$ ,  $E_{\text{H}^+/\text{H}_2}^\circ = -0.028 \text{ V}$ )<sup>3,4</sup> are known, the equilibrium potential ( $E_{\text{HA}}^\circ = -1.35 \text{ V vs Fc/Fc}^+$ ) can be calculated according to eq. S1 using Evans relationship. The overpotentials of the electrocatalytic proton reductions catalyzed by **1** and **4** were measured using eq. S2 from the potential at 0.5 ( $i_{\text{pc}}$ ), where  $i_{\text{pc}}$  is the cathodic peak current in the cyclic voltammograms recorded after addition of 20 mM of HOAc.

$$E_{\text{HA}}^\circ = E_{\text{H}^+/\text{H}_2}^\circ - (2.303RT/F) pK_{a,\text{HA}} \quad \text{eq.S1}$$

$$\text{overpotential} = |E_{\text{HA}}^\circ - E_{\text{cat}/2}| \quad \text{eq.S2}$$

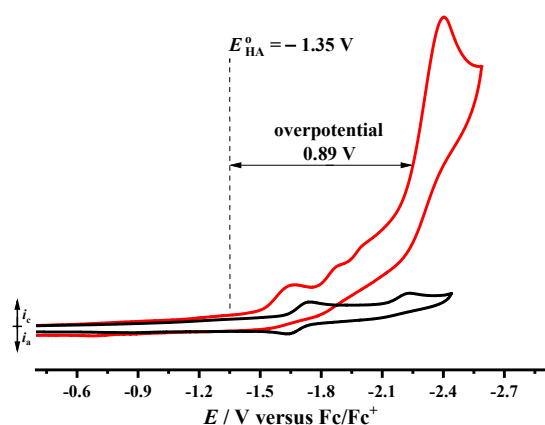

**Fig. S31** Cyclic voltammograms of **1** (1.0 mM) with HOAc (0, 20 mM) in 0.1 M *n*-Bu<sub>4</sub>NPF<sub>6</sub>/MeCN at a scan rate of 0.1 V s<sup>-1</sup>.

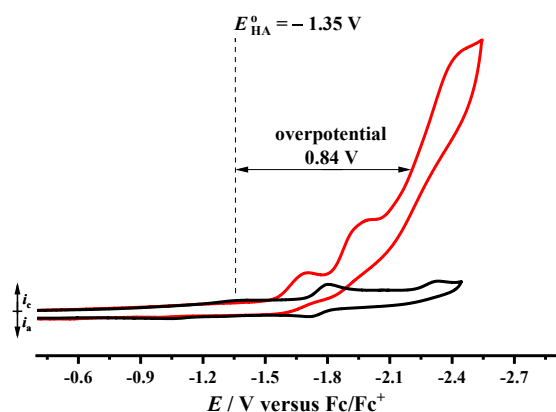

**Fig. S32** Cyclic voltammograms of **4** (1.0 mM) with HOAc (0, 20 mM) in 0.1 M *n*-Bu<sub>4</sub>NPF<sub>6</sub>/MeCN at a scan rate of 0.1 V s<sup>-1</sup>.

13. CPE experiments with 50 mM HOAc in MeCN for hydrogen evolution reaction (HER) catalyzed by 1 and 4

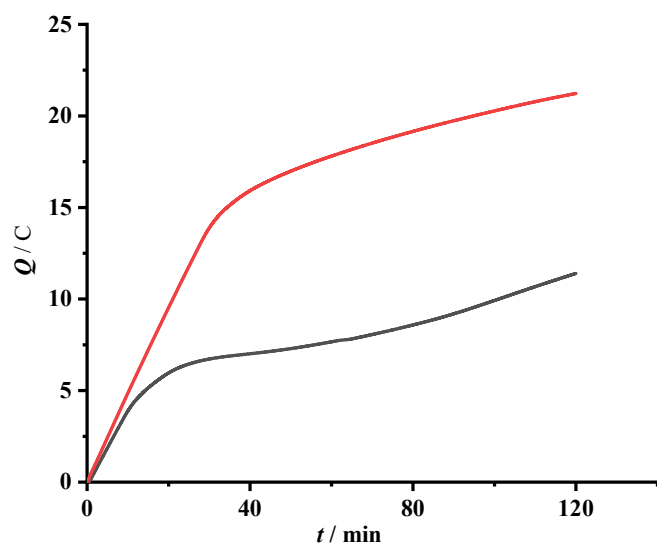

Fig. S33 CPE of 1 (1.0 mM, red line) and blank (no catalyst, black line) with 50 mM HOAc in 0.1 M  $n\text{-Bu}_4\text{NPF}_6/\text{MeCN}$  at -2.45 V.

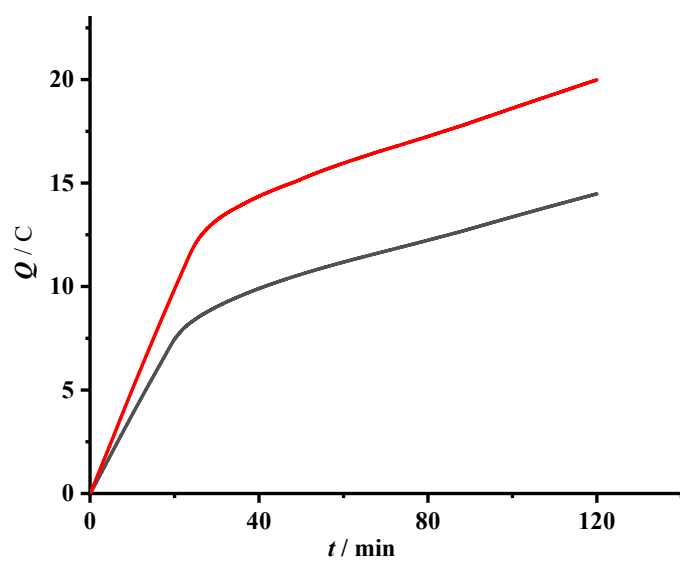

Fig. S34 CPE of 4 (1.0 mM, red line) and blank (no catalyst, black line) with 50 mM HOAc in 0.1 M  $n\text{-Bu}_4\text{NPF}_6/\text{MeCN}$  at -2.50 V.

## References

- 1 L.-C. Song, X.-F. Han, W. Chen, J.-P. Li and X.-Y. Wang, *Dalton Trans.*, 2017, **46**, 10003-10013.
- 2 L.-C. Song, Y.-X. Wang, X.-K. Xing, S.-D. Ding, L.-D. Zhang, X.-Y. Wang and H.-T. Zhang, *Chem. Eur. J.*, 2016, **22**, 16304-16314.
- 3 G. A. N. Felton, R. S. Glass, D. L. Lichtenberger and D. H. Evans, *Inorg. Chem.*, 2006, **45**, 9181-9184.
- 4 E. S. Rountree, B. D. McCarthy, T. T. Eisenhart and J. L. Dempsey, *Inorg. Chem.*, 2014, **53**, 9983-10002.
